# Supplementary material for: A unique series of dinuclear transition metal–polyradical complexes with a m-phenylenediamine spacer and their catalytic reactivity
Source: Royal Society of Chemistry journal article supplement (doi:10.1039/b300792h), 2003-01-01
Supplement: b300792h.doc [file b300792h.doc]

A unique series of dinuclear transition metal-polyradical complexes with a m-phenylenediamine spacer and their catalytic reactivity

Soumen Mukherjee, Eva Rentschler, Thomas Weyhermüller, Karl Wieghardt and Phalguni

Chaudhuri*

Max-Planck-Institut für Strahlenchemie, Stiftstrasse 34-36, D-45470 Mülheim an der Ruhr, Germany

E-mail: chaudh@mpi-muelheim.mpg.de

** ***1:*** The ligand H4L (0.3 g, 0.6 mmol), prepared in an analogous manner described earlier by us,4 CuCl (0.06 g, 0.6 mmol) and NEt3 (0.4 cm3) were dissolved under argon in CH3CN/CH3OH (1:1) and the resulting solution was refluxed for 1 h and filtered in the air. Slow evaporation of the filtrate afforded green microcrystals of **1**. Recrystallization from THF/CH3OH (4:1) afforded X-ray quality crystals. Yield: 0.40 g (53 %). Anal. calcd for C74H100Cu2N4O5.5: C, 70.50; H, 8.00; N, 4.44; Cu, 10.08;found: C, 69.1; H, 8.1; N, 4.4; Cu, 9.8. IR (KBr disk, cm-1): 1579s, 1478s. ESI-MS pos. in CH2Cl2: *m/z* 1152 [M+], UV-vis in CH2Cl2: max, nm (, M-1 cm-1): 1120(9645), 815 broad (11100), 476(16400), 388sh(25700), 336(33000). Electrochemistry (square wave voltammetry) in CH2Cl2 (0.1 M [*n*-Bu4N]PF6): E1(ox) = +0.449 (irrev.);E21/2(ox) = -0.121 (rev.); E31/2(ox) = -0.214 (rev.); E41/2(red) = -0.955 (rev.); E51/2(red) = -1.133 (rev.); E6(red) = -1.560 (irrev.) V vs Fc+/Fc.

*Crystal data for* ***1****1.5(C4H8O):* C68H88O4N4Cu2C6H12O1.5. *Mr* = 1260.66, monoclinic, space group *P*21/*c*, *a* = 15.2345(12), *b* = 18.903(2), *c* = 24.840(3) Å, ** = 90.51(2), *V* = 7153.1(13) Å3, *Z* = 4, *T* = 100(2) K, **(MoK**) = 0.71073 Å, 46103 reflections collected, 19375 independent reflections (*R*int = 0.0438), data/restraints/parameters = 19318/0/808, ShelXTL software package, *F*2 refinement, *R*1 = 0.0472, *R*2 = 0.1307 (all data).

*For* ***3:*** The ligand H4L (0.3 g, 0.6 mmol), FeCl24H2O (0.08 g, 0.44 mmol) and NEt3 (0.4 cm3) were dissolved in a solvent mixture (40 cm3) of CH2Cl2/CH3CN (4:5) and the resulting solution was refluxed for 0.5 h and filtered. Slow evaporation of the filtrate afforded green crystals of **3**. Recrystallization from acetone afforded X-ray quality crystals. Yield: 0.18 g (54 %). Anal. calcd for C102H132Fe2N6O6: C 74.23,
H 8.07, N 5.10, Fe 6.78; found: C 74.2, H 7.8, N 5.1, Fe 6.8 %. IR (KBr disk, cm-1): **  = 1579s (C=N), ** = 1478s (C-O). EI-MS: *m/z* 1649 [M+]. UV-vis in CH2Cl2: **max, nm(**, M-1 cm-1): 746 broad (35100). Electrochemistry (square wave voltammetry) in CH2Cl2 (0.1 M [*n*-Bu4N]PF6): E11/2(ox) = +0.481 (rev.), E21/2(ox) = +0.382 (rev.), E31/2(ox) = -0.108 (rev.), E41/2(ox) = -0.288 (rev.), E51/2(red) = -1.114 (rev.), E61/2(red) = -1.278 (rev.), E7(red) = -1.557 (irrev.) V vs Fc+/Fc.

*Crystal data for* ***3****0.5CH3COCH3:* C102H132Fe2N6O60.5C3H6O. *Mf* = 1678.88, mono­clinic, space group *P*21/*n*, *a* = 25.374(2), *b* = 15.7754(12), *c* = 26.287(2) Å, ** = 106.40(1)o, *V* = 10094.2(13) Å3, *Z* = 4, *T* = 100(2) K, **(MoK**) = 0.71073 Å, 33764 reflections measured at an intensity threshold of 2**(*I*), 14847 independent reflections (*R*int = 0.0768) analyzed, data/restraints/parameters = 14670/0/1081, ShelXTL software package, *F*2 refinement, *R*1 = 0.0658, *R*2 = 0.1303 (all data).

*For* ***4****:* The same protocol as that for **3** using Co(ClO4)26H2O (0.16 g, 0.4 mmol) yielded dark brown crystals. Yield: 0.27 g (80 %). Anal. calcd for C102H132Co2N6O6: C 73.96, H 8.04, N 5.08, Co 7.12; found: C 73.8, H 8.0, N 5.1, Co 7.2 %. IR (KBr disk, cm-1): ** = 1575s (C=N), ** = 1464s (C-O). EI-MS: *m/z* 1655 [M+]. UV-vis in CH2Cl2: **max, nm (**, M-1 cm-1): 874sh (4230), 779(5536), 700(5095), 607sh (5980), 483(8233). Electrochemistry (CV and SQW) in CH2Cl2 (0.1 M [*n*-Bu4N]PF6): E11/2(ox) = +0.247 (rev.), E21/2(ox) = +0.174 (rev.), E31/2(ox) = -0.277 (rev.), E41/2(ox) = -0.431 (rev.), E5(red) = -1.214 (irrev.) V vs Fc+/Fc.

*Crystal data for* ***4****3CH2Cl2:* C102H132Co2N6O63CH2Cl2, *M*f = 1910.77, triclinic, space group *P*-1, *a* = 15.5627(8), *b* = 16.2417(12), *C* = 23.59482) Å, ** = 74.09(1)o, *b* = 76.48(1)o, ** = 66.45(1)o, *V* = 5205.1(6) Å3, *Z* = 2, *T* = 100(2) K, **(MoK**) = 0.71073 Å, 47876 reflections measured at an intensity threshold of 2**(*I*), 29002 independent reflections (*R*int = 0.0441) analyzed, data/restraints/parameters = 26325/0/1105. Residual electron density peaks and holes are located at Cl. ShelXTL software package, *F*2 refinement, *R*1 = 0.0881, *R*2 = 0.1275 (all data).

***6:*** To a solution of the ligand (0.52 g, 1 mmol) in CH3OH (25 cm3) containing [Bu4N]­OCH3 (0.9 cm3, 2.5 mmol) "manganese(III) acetate" (0.13 g, 0.2 mmol) was added to produce to a brown solution, which was refluxed in air for 0.5 h and filtered to remove any solid particles. The deep brown microcrystalline solid separated after cooling was recrystallized from CH2Cl2/CH3CN (1:1). Yield: 0.32 g (60 %). Anal. calcd for C102H132Mn2N6O6: C, 74.34; H, 8.07; N, 5.1; Mn, 6.67; found: C, 74.3; H, 8.0; N, 5.0; Mn, 6.5. IR (KBr disk, cm-1): 1578s, 1470s. EI-MS: *m/z* 1647 [M+]. UV-vis in CH2Cl2: max, nm (, M-1 cm-1): 550(11900), 648(11500), 806(10700), 952(8420). Electro­chemistry (square wave voltammetry) in CH2Cl2 (0.1 M [*n*-Bu4N]PF6): E1(ox) = +0.575 (irrev.), E2(ox) = +0.10 (irrev.), E31/2(ox) = -0.126 (rev.), E41/2(ox) = -0.340 (rev.), E51/2(red) = -1.019 (rev.), E61/2(red) = -1.234 (rev.) V vs Fc+/Fc.

*Crystal data for* ***6****0.5CH2Cl2:* C102H132Mn2N6O60.5CH2Cl2. *Mr* = 1690.48, monoclinic, space group *P*21/*n*, *a* = 25.0716(9), *b* = 15.7152(6), *c* = 26.2842(12) Å, ** = 105.43(1)o, *V* = 9982.8(7) Å3, *Z* = 4, *T* = 100(2) K, **(MoK**) = 0.71073 Å, 56918 reflections collected, 13020 independent reflections (*R*int = 0.0922), data/restraints/-parameters = 12926/0/1072, ShelXTL software package, *F*2 refinement, *R*1 = 0.0592, *R*2 = 0.1444 (all data).
